# Supplementary material for: Association Between Positive Results on the Primary Care–Posttraumatic Stress Disorder Screen and Suicide Mortality Among US Veterans
Source: PubMed Central journal article supplement (PMC7489804; doi:10.1001/jamanetworkopen.2020.15707), 2020-09-03
Supplement: jamanetwopen-e2015707-s001.pdf [file jamanetwopen-e2015707-s001.pdf]

## Supplementary Online Content

Cooper SA, Szymanski BR, Bohnert KM, Sripada RK, McCarthy JF. Association between positive results on the Primary Care–Posttraumatic Stress Disorder Screen and suicide mortality among US veterans. *JAMA Netw Open*. 2020;3(9):e2015707. doi:10.1001/jamanetworkopen.2020.15707

**eTable 1.** *ICD-9-CM* Codes for Mental Health Diagnoses

**eTable 2.** Covariate Results of Proportional Hazards Regression Models Regarding Risk of Suicide Death for 2014 VHA PC-PTSD Screens—Positive vs Negative PC-PTSD Screens

**eTable 3.** Covariate Results of Proportional Hazards Regression Models Regarding Risk of Suicide Death for 2014 VHA PC-PTSD Screens—PC-PTSD Individual Item Responses

This supplementary material has been provided by the authors to give readers additional information about their work.

**eTable 1. ICD-9-CM Codes for Mental Health Diagnoses**

| <b>Mental Health Diagnosis</b> | <b>ICD-9-CM Codes</b>                                                                                                                                                                      |
|--------------------------------|--------------------------------------------------------------------------------------------------------------------------------------------------------------------------------------------|
| Posttraumatic Stress Disorder  | 309.81                                                                                                                                                                                     |
| Substance Use Disorder         | 291.x, 292.x, 303.0x, 303.9x, 304.0x, 304.1x, 304.2x, 304.3x,<br>304.4x, 304.5x, 304.6x, 304.7x, 304.8x, 304.9x, 305.0x, 305.2x,<br>305.3x, 305.4x, 305.5x, 305.6x, 305.7x, 305.8x, 305.9x |
| Anxiety                        | 293.84, 300.00, 300.01, 300.02, 300.09, 300.10, 300.20, 300.21,<br>300.22, 300.23, 300.29, 300.3x, 300.7x                                                                                  |
| Bipolar Disorder               | 296.0x, 296.1x, 296.4x, 296.5x, 296.6x, 296.7x, 296.8x                                                                                                                                     |
| Depression                     | 293.83, 296.2x, 296.3x, 296.90, 296.99, 298.0x, 300.4x, 301.12,<br>309.0x, 309.1x, 311.x                                                                                                   |
| Schizophrenia                  | 295.0x, 295.1x, 295.2x, 295.3x, 295.4x, 295.6x, 295.7x, 295.8x,<br>295.9x                                                                                                                  |
| Other Psychiatric Diagnosis    | 290.8-291.1, 291.3-292.81, 292.83-294.0, 294.9-305.0, 305.2-319<br>(excluding above categories)                                                                                            |

**eTable 2.** Covariate Results of Proportional Hazards Regression Models Regarding Risk of Suicide Death for 2014 VHA PC-PTSD Screens—Positive vs Negative PC-PTSD Screens (N = 1,693,449)

| Covariate                                            | Model 2: Adjusting for age and sex |                         | Model 3: Adjusting for all demographics |                         | Model 4: Adjusting for demographics and mental health diagnoses |                         | Model 5: Adjusting for demographics, mental health diagnoses, treatment and suicide attempt |                         |
|------------------------------------------------------|------------------------------------|-------------------------|-----------------------------------------|-------------------------|-----------------------------------------------------------------|-------------------------|---------------------------------------------------------------------------------------------|-------------------------|
|                                                      | Hazard Ratio                       | 95% Confidence Interval | Hazard Ratio                            | 95% Confidence Interval | Hazard Ratio                                                    | 95% Confidence Interval | Hazard Ratio                                                                                | 95% Confidence Interval |
| Service-connected for post-traumatic stress disorder |                                    |                         | 0.72                                    | 0.56-0.93               | 0.84                                                            | 0.66-1.07               | 0.86                                                                                        | 0.67-1.10               |
| Sex                                                  |                                    |                         |                                         |                         |                                                                 |                         |                                                                                             |                         |
| Male                                                 | 3.11                               | 2.35-4.12               | 3.02                                    | 2.28-4.00               | 3.22                                                            | 2.43-4.28               | 3.27                                                                                        | 2.46-4.34               |
| Female                                               | (ref)                              |                         | (ref)                                   |                         | (ref)                                                           |                         | (ref)                                                                                       |                         |
| Age Group                                            |                                    |                         |                                         |                         |                                                                 |                         |                                                                                             |                         |
| 18-34                                                | (ref)                              |                         | (ref)                                   |                         | (ref)                                                           |                         | (ref)                                                                                       |                         |
| 35-54                                                | 0.86                               | 0.73-1.02               | 1.00                                    | 0.83-1.19               | 0.90                                                            | 0.75-1.08               | 0.89                                                                                        | 0.75-1.07               |
| 55-74                                                | 0.69                               | 0.59-0.80               | 0.76                                    | 0.64-0.91               | 0.77                                                            | 0.64-0.92               | 0.77                                                                                        | 0.64-0.92               |
| 75+                                                  | 1.05                               | 0.88-1.26               | 1.20                                    | 0.97-1.49               | 1.41                                                            | 1.14-1.74               | 1.43                                                                                        | 1.16-1.78               |
| Marital Status                                       |                                    |                         |                                         |                         |                                                                 |                         |                                                                                             |                         |
| Divorced                                             |                                    |                         | (ref)                                   |                         | (ref)                                                           |                         | (ref)                                                                                       |                         |
| Married                                              |                                    |                         | 0.55                                    | 0.48-0.63               | 0.64                                                            | 0.56-0.74               | 0.65                                                                                        | 0.56-0.75               |
| Never Married/Single                                 |                                    |                         | 0.99                                    | 0.83-1.19               | 1.01                                                            | 0.85-1.20               | 1.01                                                                                        | 0.85-1.21               |
| Separated                                            |                                    |                         | 1.07                                    | 0.80-1.44               | 1.02                                                            | 0.76-1.37               | 1.01                                                                                        | 0.75-1.35               |
| Widowed                                              |                                    |                         | 0.79                                    | 0.60-1.04               | 0.86                                                            | 0.65-1.14               | 0.87                                                                                        | 0.66-1.15               |
| Unknown                                              |                                    |                         | 0.58                                    | 0.42-0.81               | 0.65                                                            | 0.47-0.91               | 0.67                                                                                        | 0.48-0.93               |
| Race                                                 |                                    |                         |                                         |                         |                                                                 |                         |                                                                                             |                         |

|                                                   |  |  |       |           |       |           |       |           |
|---------------------------------------------------|--|--|-------|-----------|-------|-----------|-------|-----------|
| American Indian or Alaska Native                  |  |  | (ref) |           | (ref) |           | (ref) |           |
| Asian                                             |  |  | 0.36  | 0.14-0.91 | 0.38  | 0.15-0.96 | 0.38  | 0.15-0.96 |
| Black or African American                         |  |  | 0.31  | 0.15-0.61 | 0.31  | 0.15-0.61 | 0.30  | 0.15-0.60 |
| White                                             |  |  | 1.14  | 0.60-2.16 | 1.09  | 0.57-2.08 | 1.07  | 0.56-2.03 |
| Two or More Races                                 |  |  | 1.42  | 0.73-2.77 | 1.01  | 0.52-1.98 | 0.89  | 0.46-1.75 |
| Unknown                                           |  |  | 0.96  | 0.47-1.97 | 1.06  | 0.52-2.17 | 1.07  | 0.52-2.20 |
| Mental Health Diagnoses                           |  |  |       |           |       |           |       |           |
| Substance Use Disorder                            |  |  |       |           | 1.59  | 1.36-1.87 | 1.38  | 1.16-1.64 |
| Anxiety                                           |  |  |       |           | 1.43  | 1.22-1.67 | 1.22  | 1.02-1.45 |
| Bipolar Disorder                                  |  |  |       |           | 2.54  | 1.99-3.24 | 1.75  | 1.31-2.34 |
| Depression                                        |  |  |       |           | 1.82  | 1.58-2.11 | 1.51  | 1.28-1.77 |
| Schizophrenia                                     |  |  |       |           | 1.65  | 1.18-2.30 | 1.11  | 0.78-1.59 |
| Other Psychiatric Diagnosis                       |  |  |       |           | 0.99  | 0.77-1.27 | 0.91  | 0.71-1.17 |
| Encounters on Assessment Date                     |  |  |       |           |       |           |       |           |
| Primary Care - Mental Health Integration (PC-MHI) |  |  |       |           |       |           | 1.35  | 1.04-1.75 |
| Non-PC-MHI Primary Care                           |  |  |       |           |       |           | 1.02  | 0.83-1.25 |
| Non-PC-MHI, Non-PC, Specialty Mental Health       |  |  |       |           |       |           | 1.33  | 1.07-1.65 |
| Other Outpatient                                  |  |  |       |           |       |           | 0.97  | 0.87-1.08 |

|                                                       |  |  |  |  |  |  |      |           |
|-------------------------------------------------------|--|--|--|--|--|--|------|-----------|
| Inpatient Mental Health                               |  |  |  |  |  |  | 1.80 | 1.14-2.84 |
| Other Inpatient                                       |  |  |  |  |  |  | 0.50 | 0.27-0.91 |
| Inpatient MH Stay in the prior 365 days               |  |  |  |  |  |  | 0.91 | 0.61-1.34 |
| ED Visit in the prior 365 days                        |  |  |  |  |  |  | 1.11 | 0.93-1.33 |
| Presence a Medication fill in the prior 365 days      |  |  |  |  |  |  |      |           |
| Antipsychotic                                         |  |  |  |  |  |  | 1.45 | 1.13-1.85 |
| Antidepressant                                        |  |  |  |  |  |  | 1.09 | 0.92-1.28 |
| Benzodiazepine                                        |  |  |  |  |  |  | 1.01 | 0.75-1.36 |
| Mood Stabilizer                                       |  |  |  |  |  |  | 1.16 | 0.98-1.37 |
| Anxiolytic/Sedative                                   |  |  |  |  |  |  | 1.31 | 1.00-1.72 |
| Prior Suicide Attempt                                 |  |  |  |  |  |  | 3.08 | 1.91-4.96 |
| Number of Inpatient MH bed days in the prior 365 days |  |  |  |  |  |  | 1.00 | 0.99-1.00 |
| Number of ED visits in the prior 365 days             |  |  |  |  |  |  | 0.98 | 0.92-1.04 |

**eTable 3.** Covariate Results of Proportional Hazards Regression Models Regarding Risk of Suicide Death for 2014 VHA PC-PTSD Screens—PC-PTSD Individual Item Responses (N = 1,693,449)

| Covariate                                            | Model 2: Adjusting for age and sex |                         | Model 3: Adjusting for all demographics |                         | Model 4: Adjusting for demographics and mental health diagnoses |                         | Model 5: Adjusting for demographics, mental health diagnoses, treatment and suicide attempt |                         |
|------------------------------------------------------|------------------------------------|-------------------------|-----------------------------------------|-------------------------|-----------------------------------------------------------------|-------------------------|---------------------------------------------------------------------------------------------|-------------------------|
|                                                      | Hazard Ratio                       | 95% Confidence Interval | Hazard Ratio                            | 95% Confidence Interval | Hazard Ratio                                                    | 95% Confidence Interval | Hazard Ratio                                                                                | 95% Confidence Interval |
| Service-connected for post-traumatic stress disorder |                                    |                         | 0.71                                    | 0.56-0.92               | 0.85                                                            | 0.66-1.08               | 0.87                                                                                        | 0.68-1.12               |
| Sex                                                  |                                    |                         |                                         |                         |                                                                 |                         |                                                                                             |                         |
| Male                                                 | 3.12                               | 2.36-4.13               | 3.02                                    | 2.28-4.00               | 3.23                                                            | 2.43-4.29               | 3.28                                                                                        | 2.47-4.35               |
| Female                                               | (ref)                              |                         | (ref)                                   |                         | (ref)                                                           |                         | (ref)                                                                                       |                         |
| Age Group                                            |                                    |                         |                                         |                         |                                                                 |                         |                                                                                             |                         |
| 18-34                                                | (ref)                              |                         | (ref)                                   |                         | (ref)                                                           |                         | (ref)                                                                                       |                         |
| 35-54                                                | 0.87                               | 0.73-1.03               | 1.01                                    | 0.84-1.20               | 0.90                                                            | 0.75-1.08               | 0.89                                                                                        | 0.74-1.07               |
| 55-74                                                | 0.70                               | 0.60-0.82               | 0.78                                    | 0.65-0.94               | 0.77                                                            | 0.64-0.92               | 0.77                                                                                        | 0.64-0.92               |
| 75+                                                  | 1.09                               | 0.91-1.31               | 1.24                                    | 1.00-1.54               | 1.41                                                            | 1.14-1.75               | 1.43                                                                                        | 1.15-1.78               |
| Marital Status                                       |                                    |                         |                                         |                         |                                                                 |                         |                                                                                             |                         |
| Divorced                                             |                                    |                         | (ref)                                   |                         | (ref)                                                           |                         | (ref)                                                                                       |                         |
| Married                                              |                                    |                         | 0.55                                    | 0.48-0.64               | 0.64                                                            | 0.56-0.74               | 0.65                                                                                        | 0.57-0.75               |
| Never Married/Single                                 |                                    |                         | 1.00                                    | 0.83-1.19               | 1.01                                                            | 0.84-1.20               | 1.01                                                                                        | 0.85-1.21               |
| Separated                                            |                                    |                         | 1.07                                    | 0.79-1.44               | 1.02                                                            | 0.76-1.37               | 1.01                                                                                        | 0.75-1.35               |
| Widowed                                              |                                    |                         | 0.79                                    | 0.60-1.05               | 0.86                                                            | 0.66-1.14               | 0.87                                                                                        | 0.66-1.15               |
| Unknown                                              |                                    |                         | 0.58                                    | 0.42-0.81               | 0.65                                                            | 0.47-0.91               | 0.67                                                                                        | 0.48-0.93               |
| Race                                                 |                                    |                         |                                         |                         |                                                                 |                         |                                                                                             |                         |

|                                                   |  |  |       |           |       |           |       |           |
|---------------------------------------------------|--|--|-------|-----------|-------|-----------|-------|-----------|
| American Indian or Alaska Native                  |  |  | (ref) |           | (ref) |           | (ref) |           |
| Asian                                             |  |  | 0.36  | 0.14-0.92 | 0.38  | 0.15-0.96 | 0.37  | 0.15-0.95 |
| Black or African American                         |  |  | 0.31  | 0.16-0.61 | 0.31  | 0.15-0.61 | 0.30  | 0.15-0.60 |
| White                                             |  |  | 1.14  | 0.60-2.18 | 1.09  | 0.57-2.08 | 1.06  | 0.56-2.03 |
| Two or More Races                                 |  |  | 1.42  | 0.73-2.77 | 1.01  | 0.52-1.98 | 0.89  | 0.46-1.74 |
| Unknown                                           |  |  | 0.97  | 0.47-1.98 | 1.06  | 0.52-2.16 | 1.07  | 0.52-2.20 |
| Mental Health Diagnoses                           |  |  |       |           |       |           |       |           |
| Substance Use Disorder                            |  |  |       |           | 1.59  | 1.35-1.86 | 1.38  | 1.16-1.64 |
| Anxiety                                           |  |  |       |           | 1.43  | 1.22-1.67 | 1.22  | 1.02-1.45 |
| Bipolar Disorder                                  |  |  |       |           | 2.53  | 1.98-3.22 | 1.74  | 1.30-2.33 |
| Depression                                        |  |  |       |           | 1.81  | 1.56-2.09 | 1.50  | 1.28-1.76 |
| Schizophrenia                                     |  |  |       |           | 1.65  | 1.18-2.30 | 1.12  | 0.78-1.59 |
| Other Psychiatric Diagnosis                       |  |  |       |           | 0.99  | 0.77-1.27 | 0.92  | 0.71-1.18 |
| Encounters on Assessment Date                     |  |  |       |           |       |           |       |           |
| Primary Care - Mental Health Integration (PC-MHI) |  |  |       |           |       |           | 1.34  | 1.04-1.74 |
| Non-PC-MHI Primary Care                           |  |  |       |           |       |           | 1.02  | 0.83-1.25 |
| Non-PC-MHI, Non-PC, Specialty Mental Health       |  |  |       |           |       |           | 1.32  | 1.07-1.64 |
| Other Outpatient                                  |  |  |       |           |       |           | 0.97  | 0.88-1.08 |

|                                                       |  |  |  |  |  |  |      |           |
|-------------------------------------------------------|--|--|--|--|--|--|------|-----------|
| Inpatient Mental Health                               |  |  |  |  |  |  | 1.79 | 1.14-2.83 |
| Other Inpatient                                       |  |  |  |  |  |  | 0.50 | 0.27-0.91 |
| Inpatient MH Stay in the prior 365 days               |  |  |  |  |  |  | 0.91 | 0.61-1.35 |
| ED Visit in the prior 365 days                        |  |  |  |  |  |  | 1.11 | 0.93-1.33 |
| Presence a Medication fill in the prior 365 days      |  |  |  |  |  |  |      |           |
| Antipsychotic                                         |  |  |  |  |  |  | 1.45 | 1.14-1.85 |
| Antidepressant                                        |  |  |  |  |  |  | 1.09 | 0.92-1.28 |
| Benzodiazepine                                        |  |  |  |  |  |  | 1.01 | 0.75-1.36 |
| Mood Stabilizer                                       |  |  |  |  |  |  | 1.16 | 0.98-1.37 |
| Anxiolytic/Sedative                                   |  |  |  |  |  |  | 1.32 | 1.01-1.72 |
| Prior Suicide Attempt                                 |  |  |  |  |  |  | 3.07 | 1.90-4.94 |
| Number of Inpatient MH bed days in the prior 365 days |  |  |  |  |  |  | 1.00 | 0.99-1.00 |
| Number of ED visits in the prior 365 days             |  |  |  |  |  |  | 0.98 | 0.92-1.04 |
